# Supplementary material for: Preparation of Vancomycin-Loaded Aerogels Implementing Inkjet Printing and Superhydrophobic Surfaces
Source: MDPI journal article supplement (doi:10.3390/gels8070417), 2022-07-04
Supplement: s1 [file s1]

## Article

# Preparation of Vancomycin-Loaded Aerogels Implementing Inkjet Printing and Superhydrophobic Surfaces

Patricia Remuñán-Pose <sup>1</sup>, Clara López-Iglesias <sup>1</sup>; Ana Iglesias-Mejuto <sup>1</sup>; Joao F. Mano <sup>2</sup>, Carlos A. García-González <sup>1,\*</sup> and M. Isabel Rial-Hermida <sup>1,\*</sup>

<sup>1</sup> Departamento de Farmacología, Farmacia e Tecnoloxía Farmacéutica, I+D Farma Group (GI-1645), Faculty of Pharmacy, iMATUS and Health Research Institute of Santiago de Compostela (IDIS), Universidade de Santiago de Compostela, 15782 Santiago de Compostela, Spain; patricia.remuinan@rai.usc.es (P.R.-P.); clara.lopez.iglesias@rai.usc.es (C.L.-I.); ana.iglesias.mejuto@rai.usc.es (A.I.-M.)

<sup>2</sup> CICECO Aveiro Institute of Materials, Chemistry Department, University of Aveiro, 3810-193 Aveiro, Portugal; jmano@ua.pt

\* Correspondence: carlos.garcia@usc.es (C.A.G.-G.); mariaisabel.rial@usc.es (M.I.R.-H.) Tel: +34881815252

## Supplementary Materials

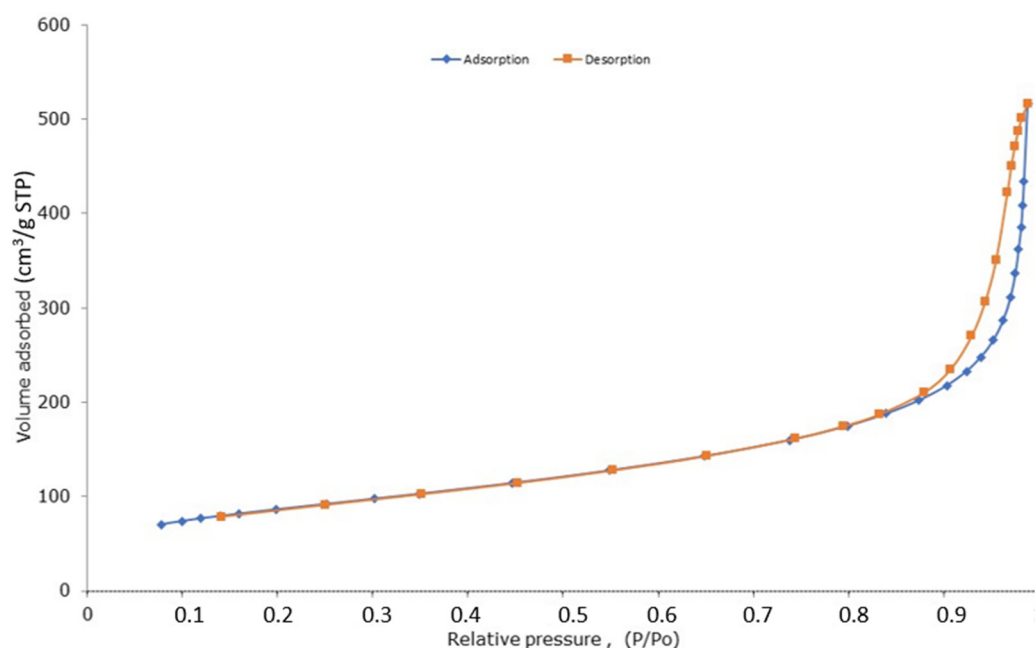

**Figure S1.** Nitrogen adsorption-desorption isotherm of blank alginate aerogels. This isotherm is representative of all aerogel formulations.

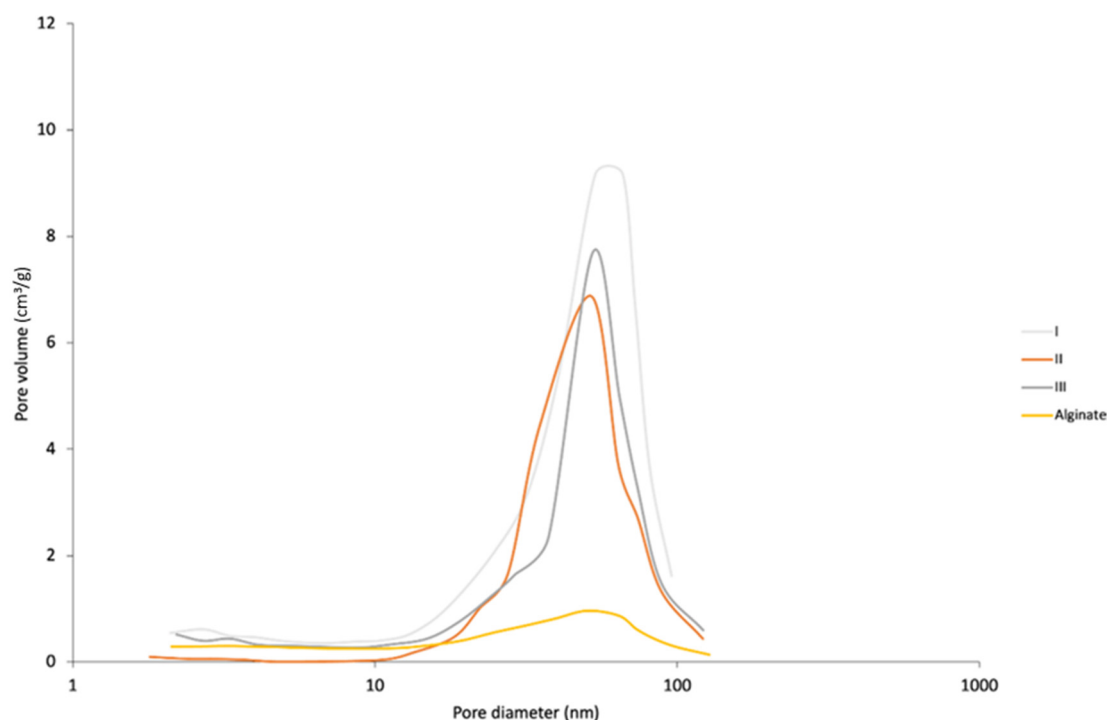

**Figure S2.** Pore size distribution of blank and drug-loaded aerogel formulations obtained by technological combination of inkjet printing and superhydrophobic surfaces.

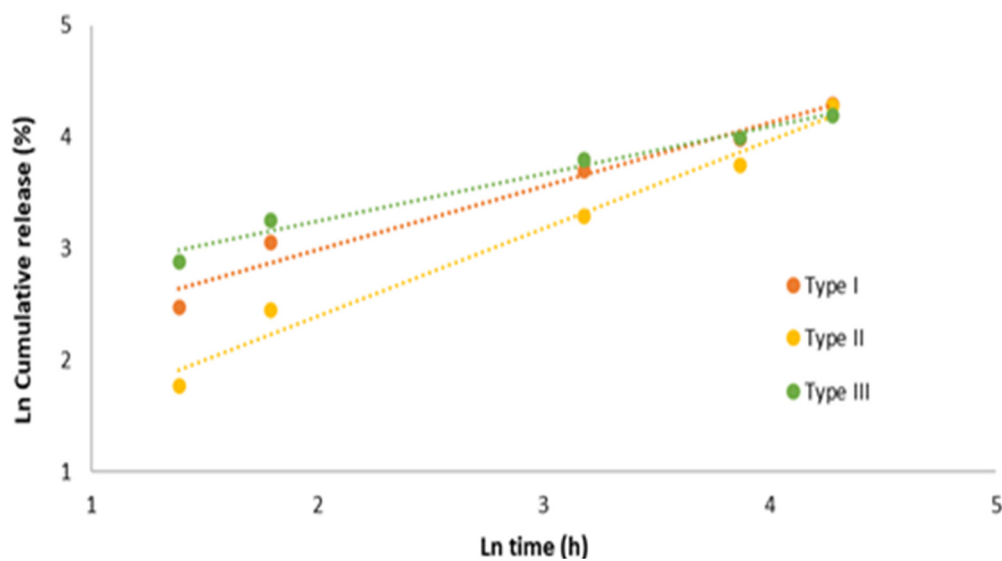

**Figure S3.** Vancomycin release kinetics fitting to Ritger-Peppas equation from alginate aerogel matrices. Dotted lines representing theoretical values estimated with the model. Standard deviations are not shown for the sake of clarity.

**Video S1:** Manufacturing of the drop-by-demand aerogels implementing superhydrophobic surfaces.
